# Supplementary material for: Hydrogenase biomimetics with redox-active ligands: Synthesis, structure and electrocatalytic studies on Fe2(CO)4(K2-dppn)(&micro;-edt) (edt = ethanedithiolate; dppn = 1,8-bis(diphenylphosphino)naphthalene)
Source: Preprints.org preprint supplement (doi:10.20944/preprints201808.0477.v1), 2018-08-28
Supplement: Supplementary file 1 [file supplementary]

**Electronic Supplementary Information (ESI)**

**Hydrogenase biomimetics with redox-active ligands: Synthesis, structure and electrocatalytic studies on Fe2(CO)4(2-dppn)(µ-edt) (edt = ethanedithiolate; dppn = 1,8-bis(diphenylphosphino)naphthalene)**

### Shishir Ghosh,a,b,c,* Shahed Rana,b Nathan Hollingsworth,c Michael G. Richmond,d Shariff E. Kabirb and Graeme Hogartha,*

**Fig. S1.** CVs of [Fe2(CO)4(2-dppn)(-edt)] (**3**) at various scan rates as shown in the legend (in MeCN, 1 mM solution, supporting electrolyte [NBu4][PF6], scan rate 0.1 Vs-1, glassy carbon electrode, potential vs Fc+/Fc).

**Fig. S2.** Scan rate dependence of the cathodic and anodic peak currents for the reduction of [Fe2(CO)4(2-dppn)(-edt)] (**3**) in MeCN (1 mM solution, supporting electrolyte [NBu4][PF6], glassy carbon electrode, potential vs Fc+/Fc). Lines show best linear fit of data.

**Fig. S3.** Scan rate (ν) dependence of the current function (*i*p/√ν) for the reduction of [Fe2(CO)4(2-dppn)(-edt)] (**3**) (1 mM solution in MeCN, supporting electrolyte [NBu4][PF6], glassy carbon electrode, potential vs Fc+/Fc).

**Fig. S4.** CVs of [Fe2(CO)4(2-dppn)(-edt)] (**3**) in the absence of acid and in the presence of 1-10 equivalents of CF3CO2H (in MeCN, 1 mM solution, supporting electrolyte [NBu4][PF6], scan rate 0.1 Vs-1, glassy carbon electrode, potential vs Fc+/Fc).


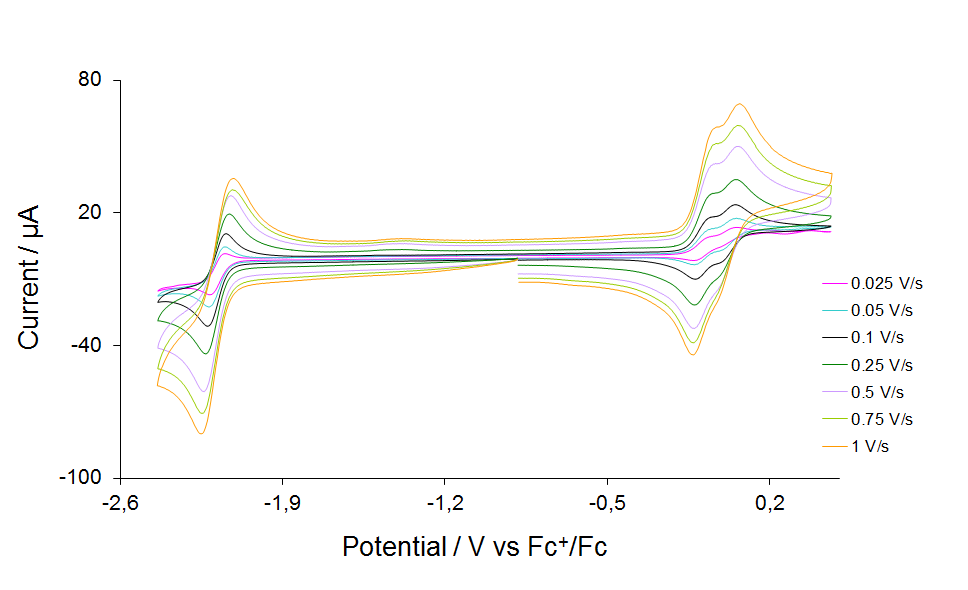


**Fig. S1.** CVs of [Fe2(CO)4(2-dppn)(-edt)] (**3**) at various scan rates as shown in the legend (in MeCN, 1 mM solution, supporting electrolyte [NBu4][PF6], scan rate 0.1 Vs-1, glassy carbon electrode, potential vs Fc+/Fc).


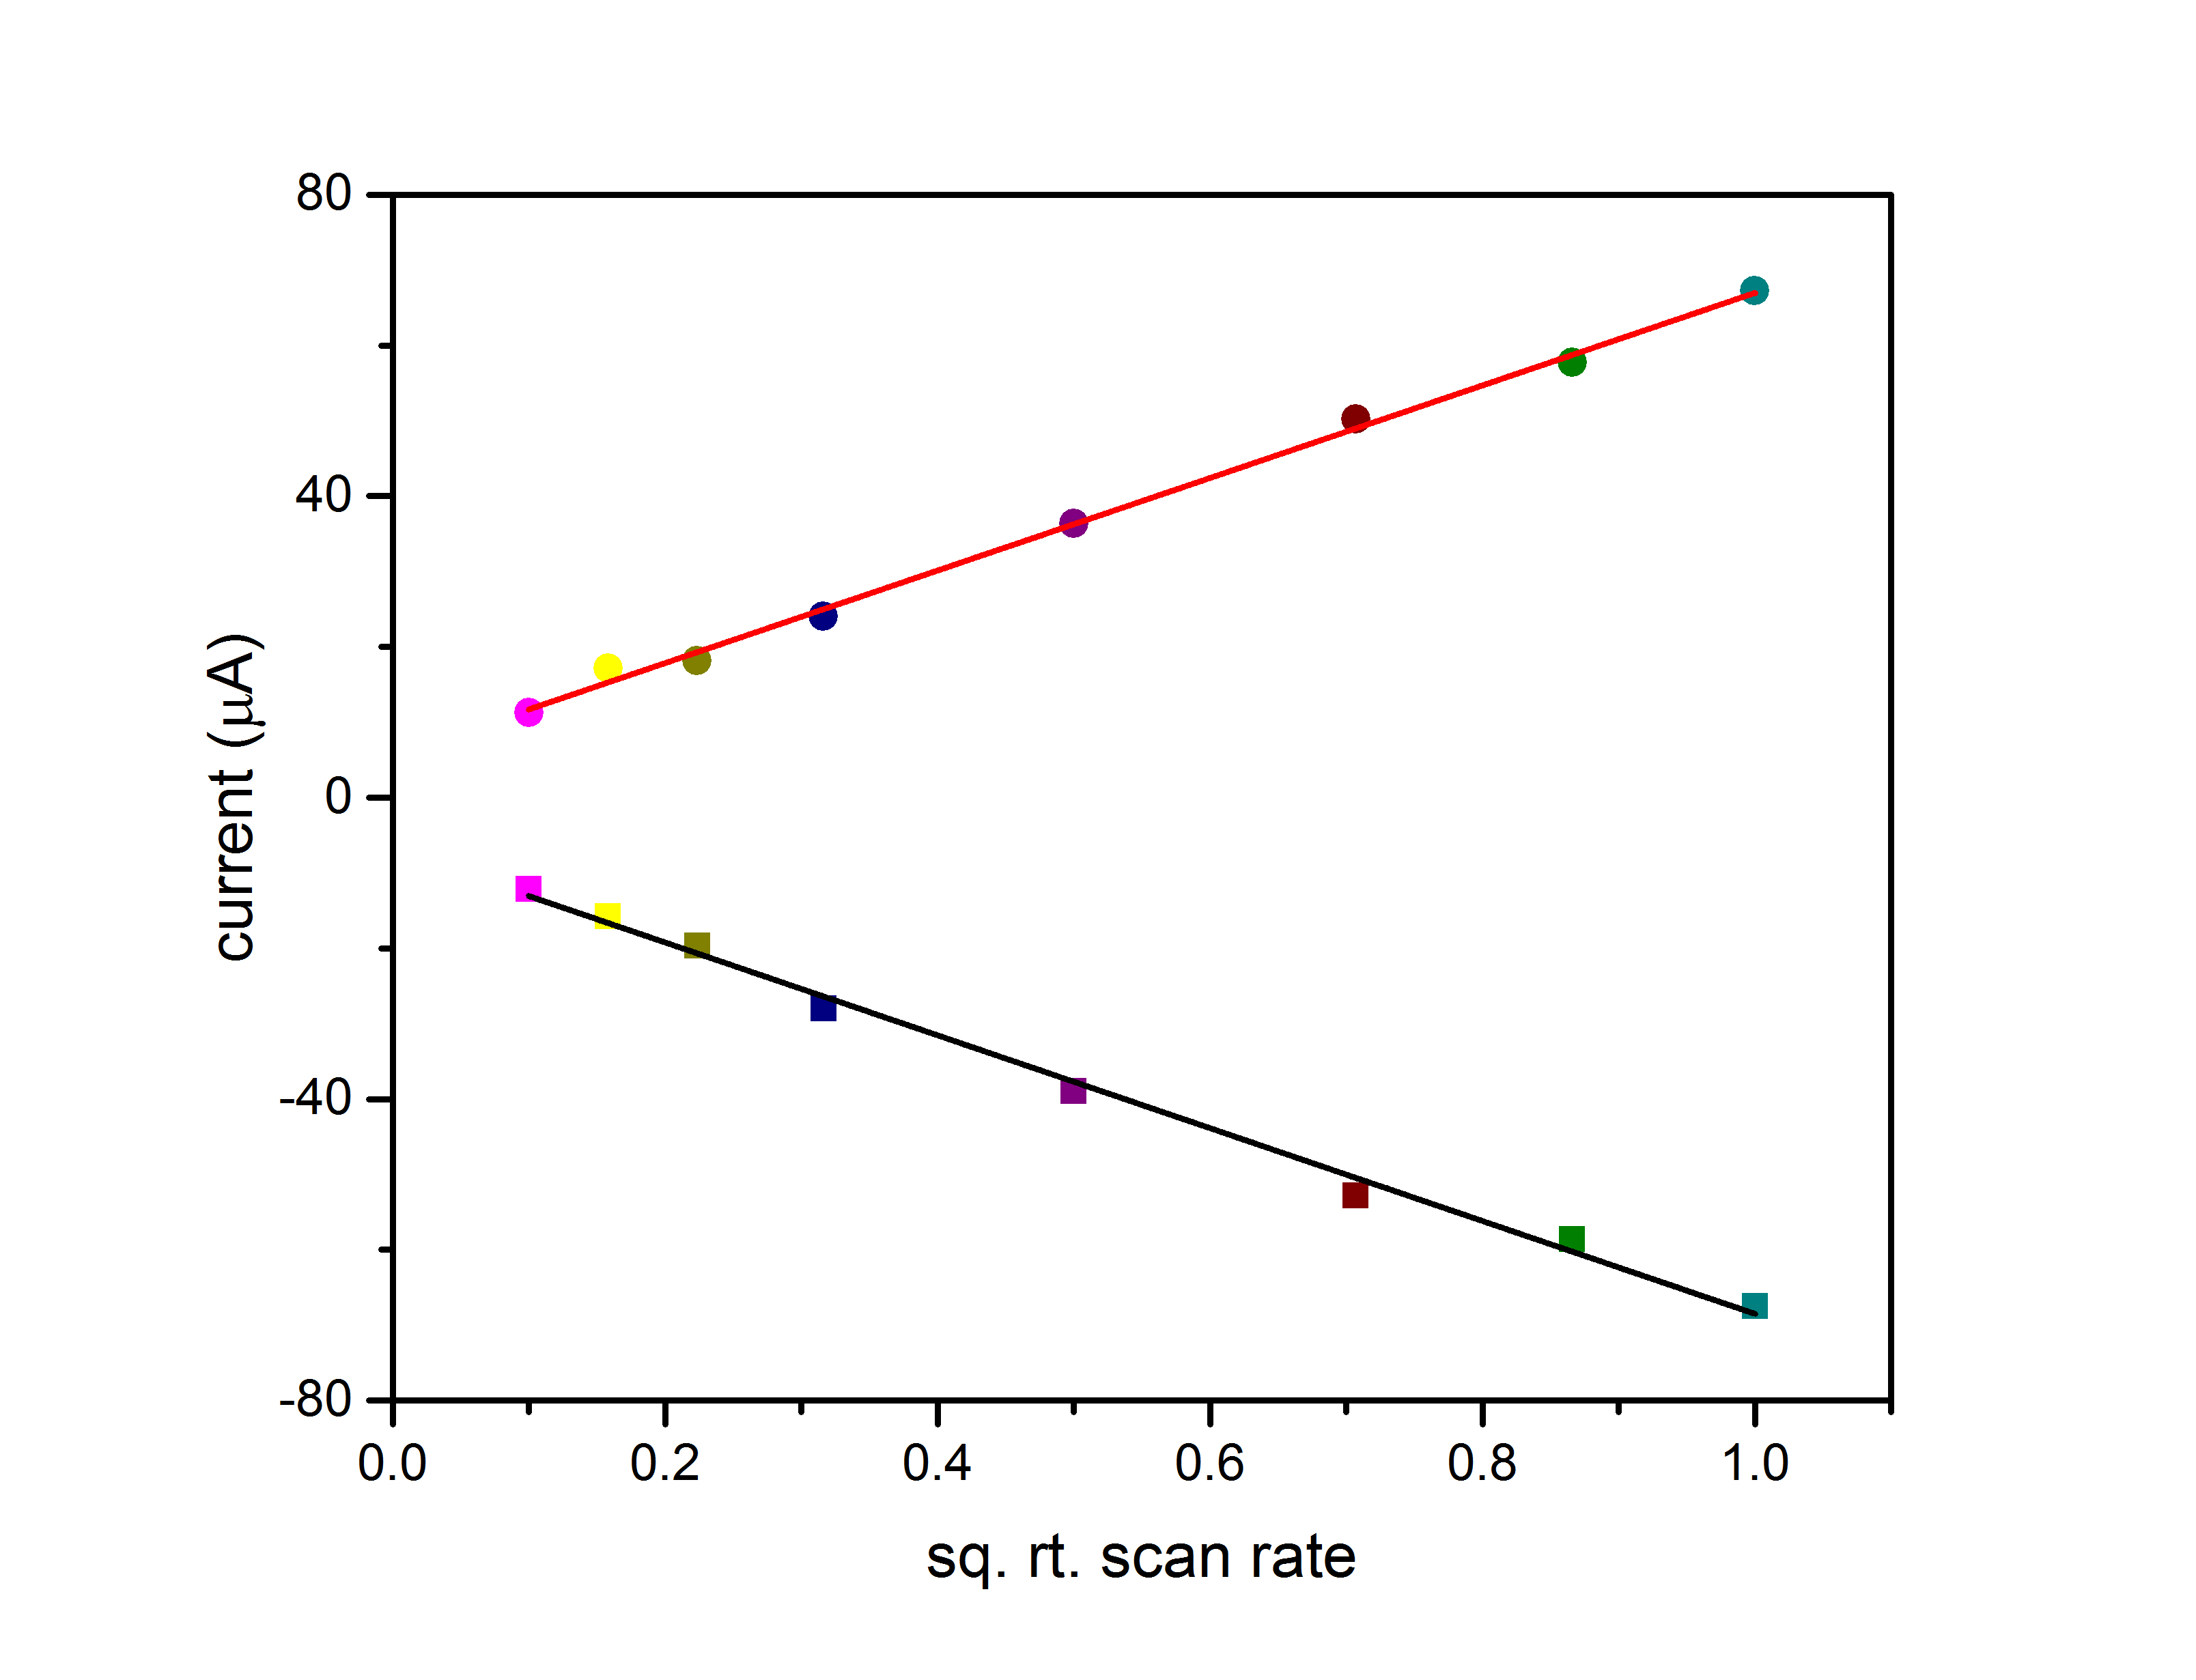


**Fig. S2.** Scan rate dependence of the cathodic and anodic peak currents for the reduction of [Fe2(CO)4(2-dppn)(-edt)] (**3**) in MeCN (1 mM solution, supporting electrolyte [NBu4][PF6], glassy carbon electrode, potential vs Fc+/Fc). Lines show best linear fit of data.


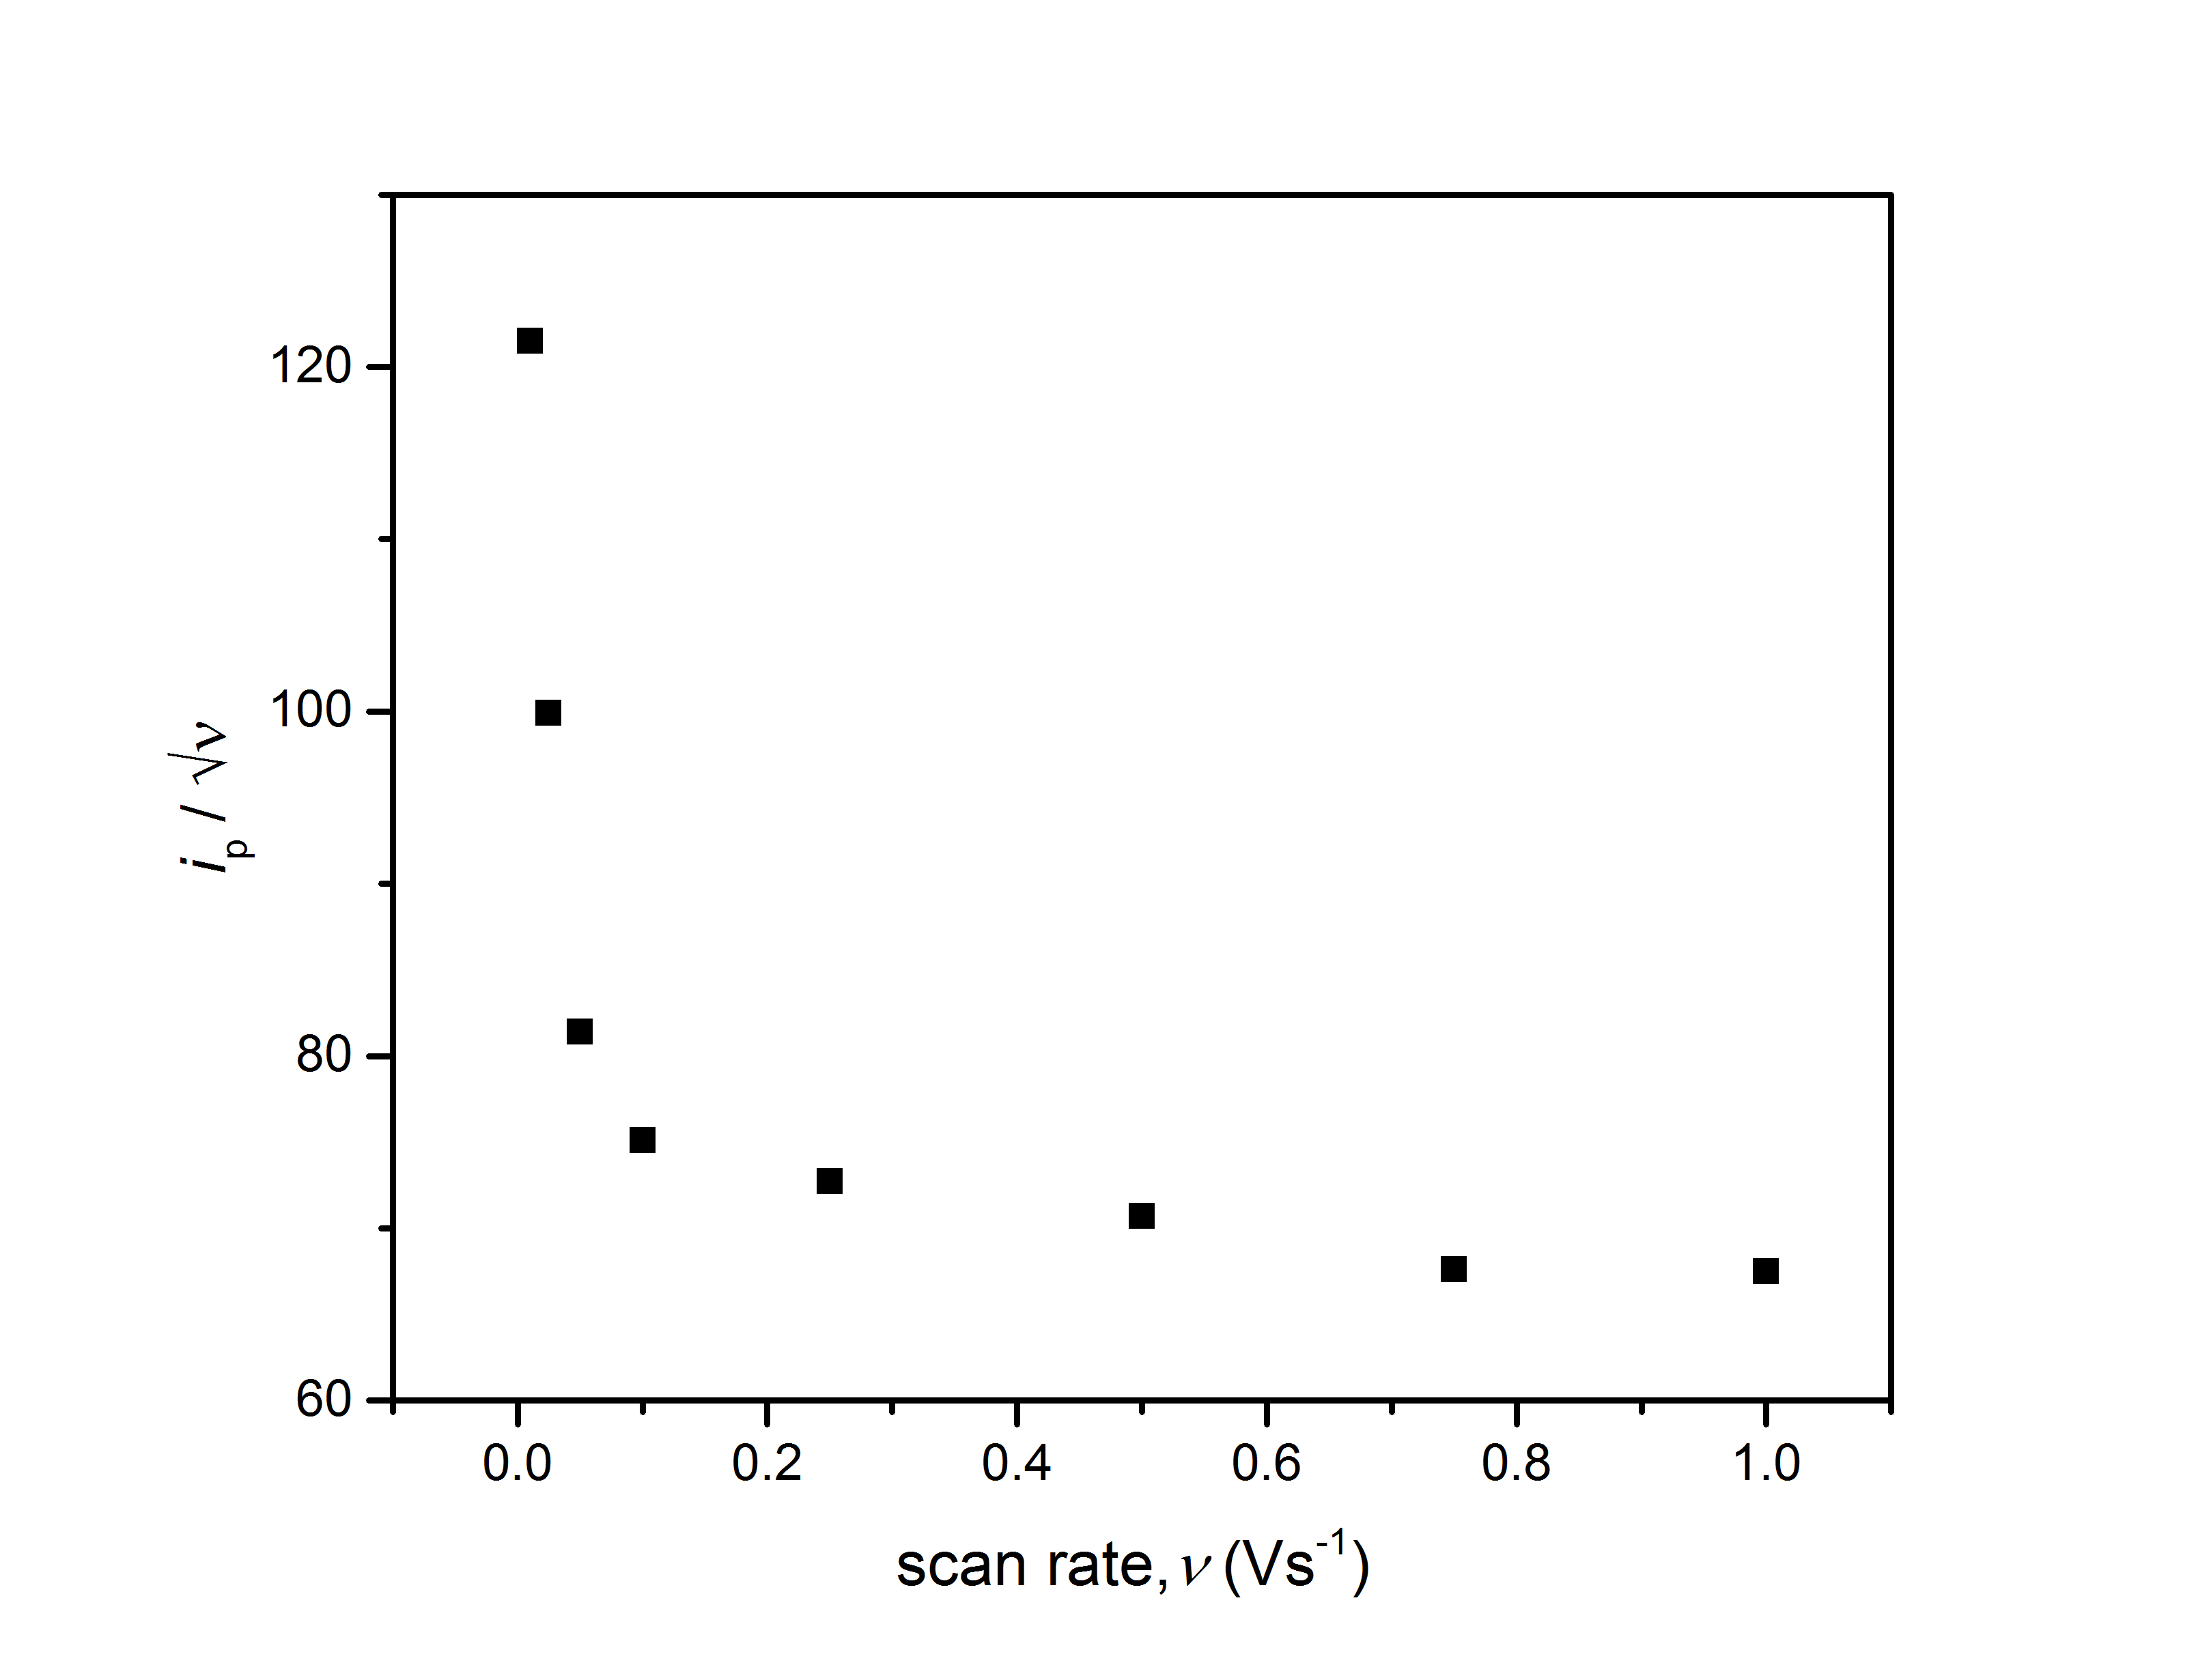


**Fig. S3.** Scan rate (ν) dependence of the current function (*i*p/√ν) for the reduction of [Fe2(CO)4(2-dppn)(-edt)] (**3**) (1 mM solution in MeCN, supporting electrolyte [NBu4][PF6], glassy carbon electrode, potential vs Fc+/Fc).


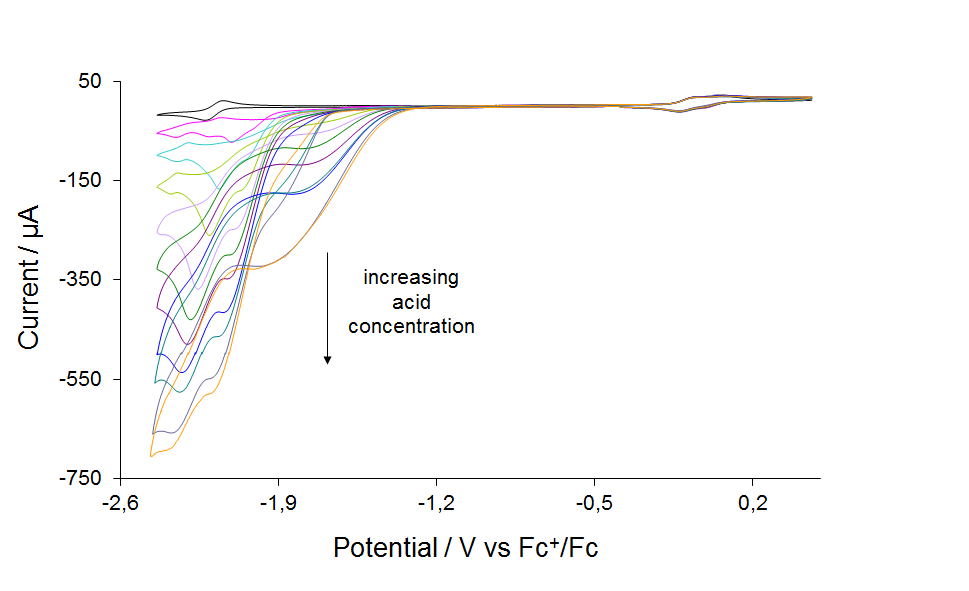


**Fig. S4.** CVs of [Fe2(CO)4(2-dppn)(-edt)] (**3**) in the absence of acid and in the presence of 1-10 equivalents of CF3CO2H (in MeCN, 1 mM solution, supporting electrolyte [NBu4][PF6], scan rate 0.1 Vs-1, glassy carbon electrode, potential vs Fc+/Fc).
